# Supplementary material for: A graphene supported polyimide nanocomposite as a high performance organic cathode material for lithium ion batteries
Source: Royal Society of Chemistry journal article supplement (doi:10.1039/c5ra27471k), 2016-01-01
Supplement: c5ra27471k1.pdf [file c5ra27471k1.pdf]

## Supporting Information

### Graphene Supported Polyimide Nanocomposite as a High Performance Organic Cathode Material for Lithium Ion Batteries

Aziz Ahmad, <sup>a,c</sup> Haiping Wu, <sup>a</sup> Yufen Guo, <sup>b</sup> Qinghai Meng, <sup>a,c</sup> Yuena Meng, <sup>a</sup> Kun Lu, <sup>a</sup> Liwei Liu, <sup>\*,b</sup> and Zhixiang Wei, <sup>\*,a</sup>

<sup>a</sup>CAS Key Laboratory of Nanosystem and Hierarchical Fabrication, National Center for Nanoscience and Technology, Beiyitiao No. 11, Zhongguancun, Beijing 100190, China.

<sup>b</sup>Suzhou Institute of Nano-Tech and Nano-Bionics, Chinese Academy of Sciences, Suzhou 215123, China

<sup>c</sup>University of Chinese Academy of Sciences, Beijing 100039, China

Corresponding author E-mail: [weizx@nanoctr.cn](mailto:weizx@nanoctr.cn); [hwliu2007@sinano.ac.cn](mailto:hwliu2007@sinano.ac.cn). Fax: +86-62656765; Tel: +86-82545565

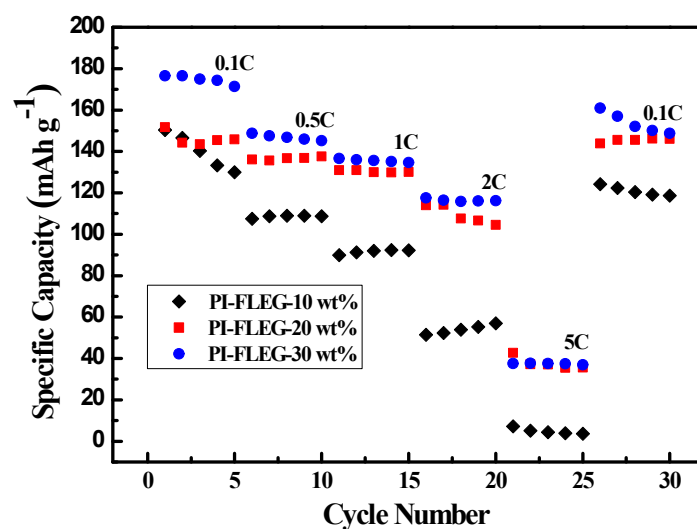

Figure S1. Rate Performance of PI-FLEG with variation of conductive carbon.

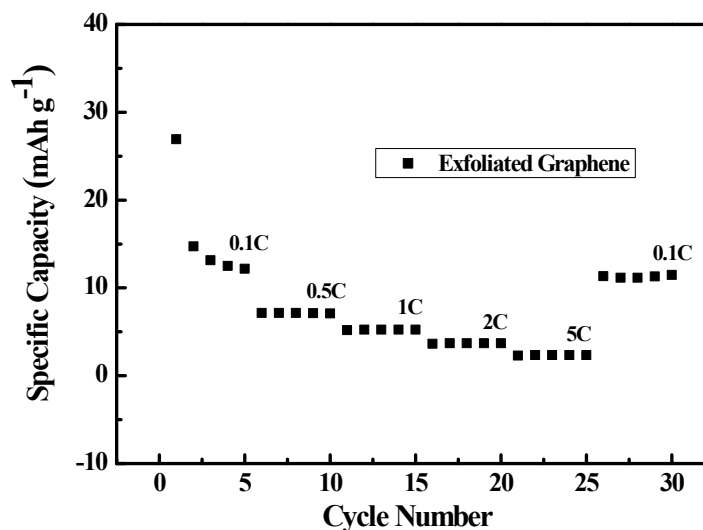

Figure S2. Rate performance of FLEG (1C=443 mA g<sup>-1</sup>).

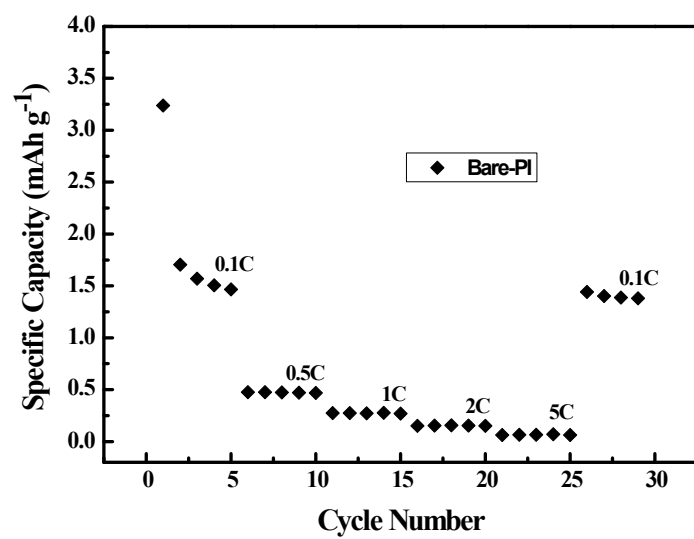

**Figure S3.** Rate performance of bare PI at various C-rates.
